# Supplementary material for: The change of activation energy in microchannel laminar flow as demonstrated by kinetic analysis of the DNA duplex–coil equilibrium
Source: Royal Society of Chemistry journal article supplement (doi:10.1039/b800986d), 2008-01-01
Supplement: b800986d.pdf [file b800986d.pdf]

## The Change of Activation Energy in Microchannel Laminar Flow as Demonstrated by Kinetic Analysis of DNA duplex-coil Equilibrium

Kenichi Yamashita,<sup>a</sup> Masaya Miyazaki,<sup>a,b</sup> Yoshiko Yamaguchi,<sup>a</sup> Hiroyuki Nakamura,<sup>a</sup> and Hideaki Maeda\*<sup>a,b,c</sup>

<sup>a</sup> Micro- & Nano-space Chemistry Group, Nanotechnology Research Institute, National Institute of Advanced Industrial Science and Technology (AIST), 807-1, Shuku-machi, Tosu, Saga 841-0052, Japan. Fax: (+81)942-81-3657; Tel: (+81)942-81-3676; E-mail: h.maeda@m.aist.go.jp

<sup>b</sup> Graduate School of Engineering Sciences, Kyushu University, 6-1, Kasuga-Kouen, Kasuga, Fukuoka 816-8580, Japan.

<sup>c</sup> CREST, JST

Article Ref: B800986D

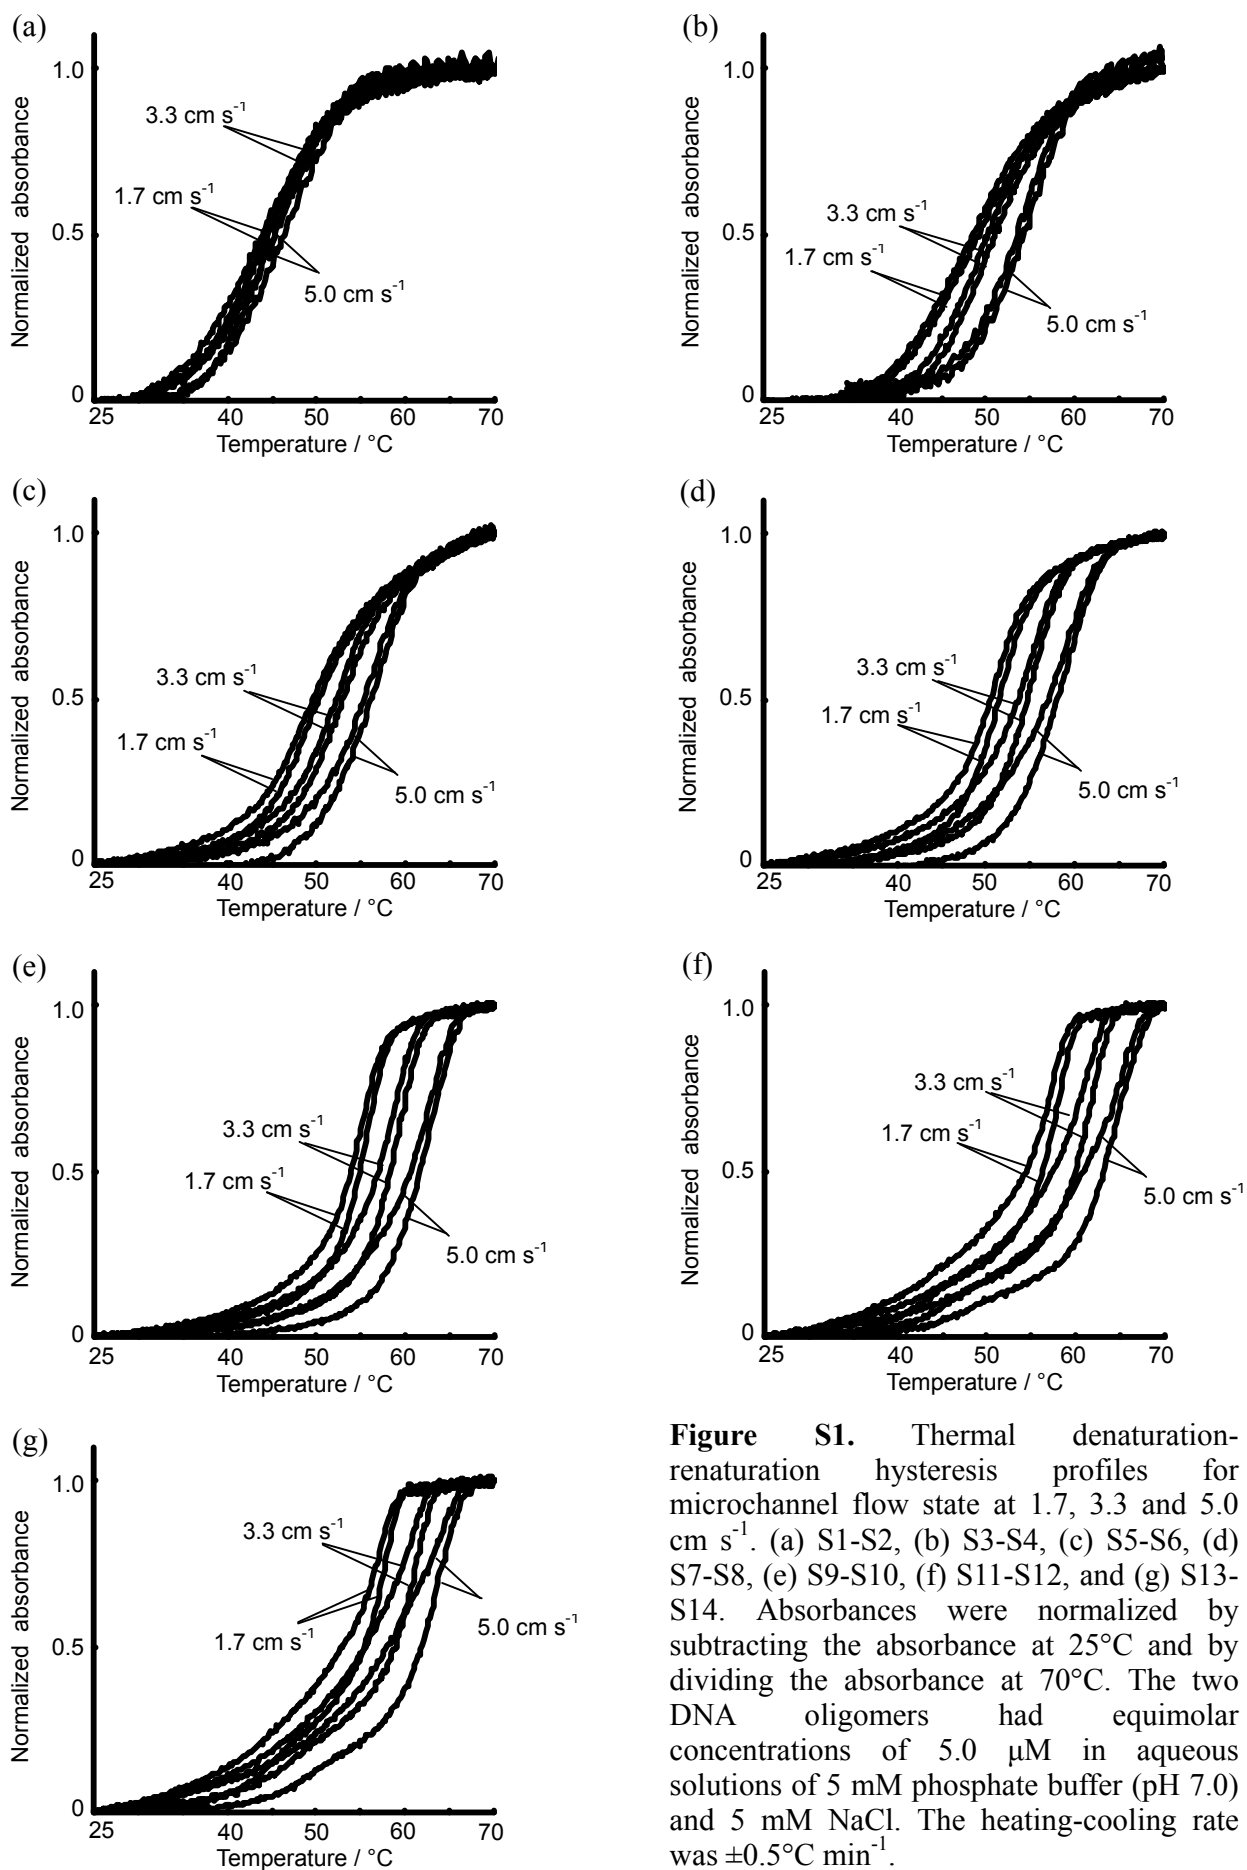

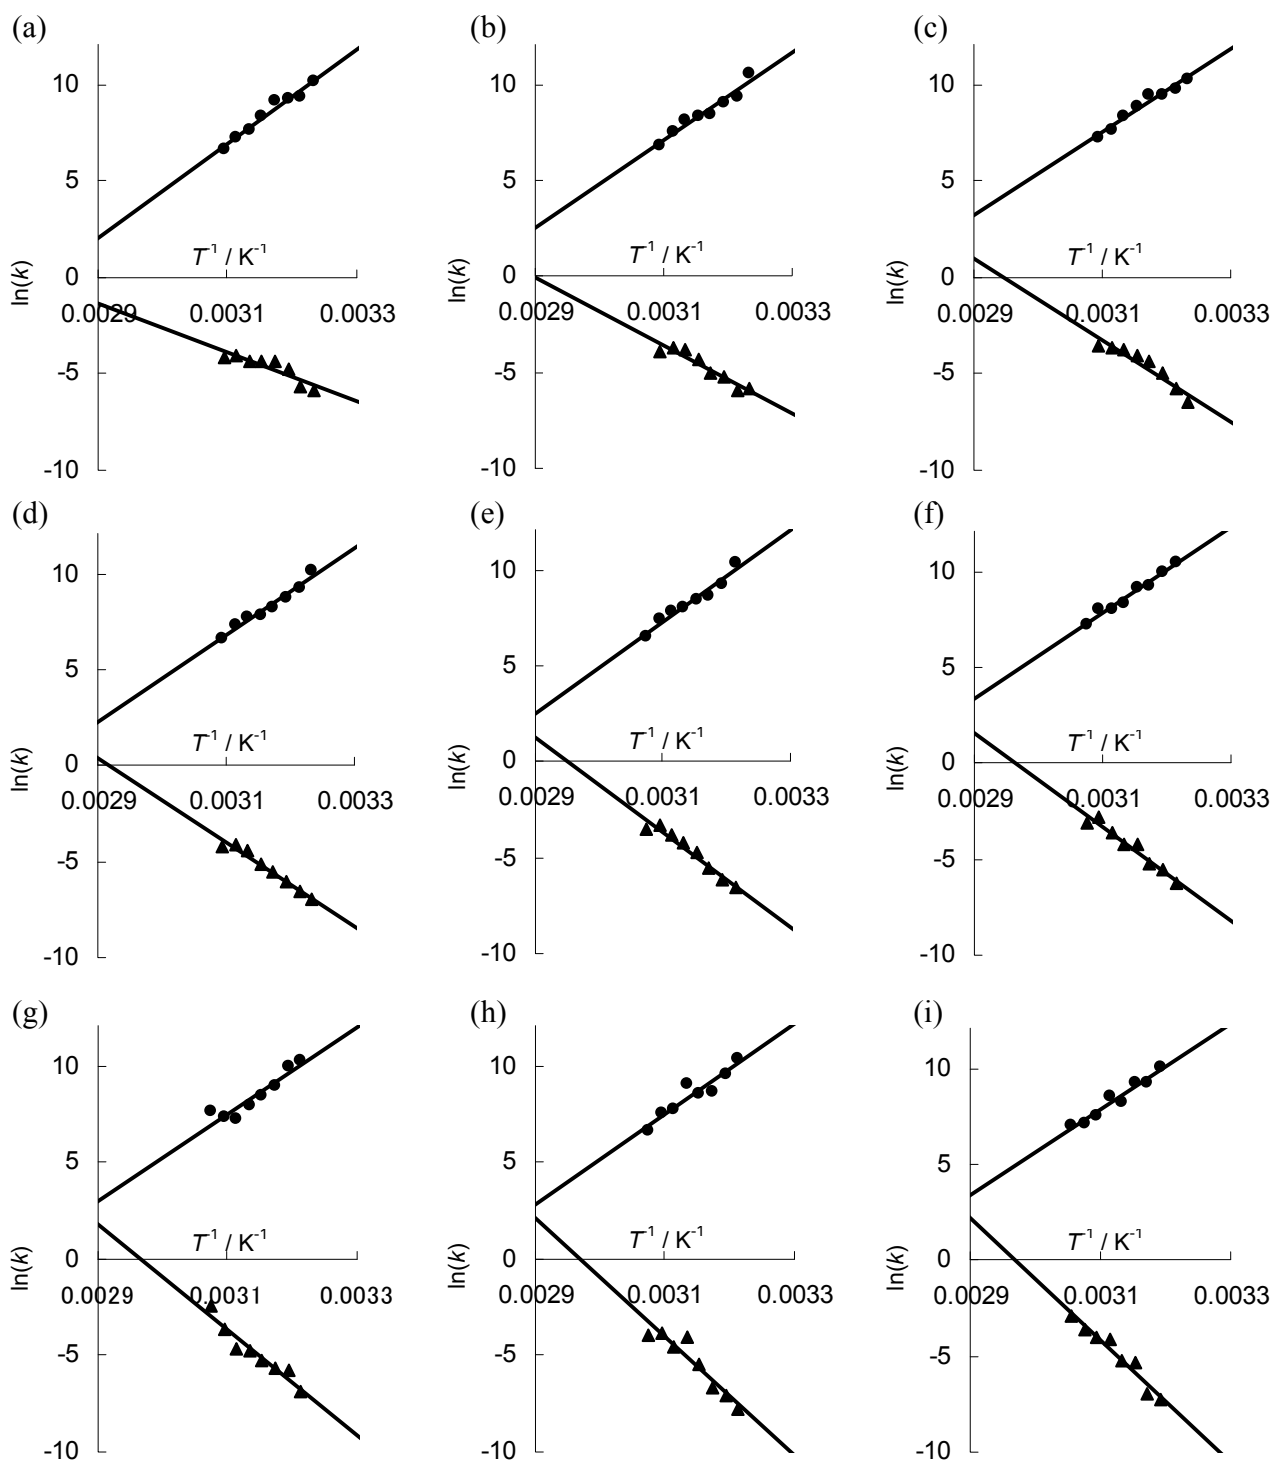

**Figure S2-1.** Arrhenius plots of S1-S2 of (●) association and (▲) dissociation for (a) batchwise or microchannel flow state at (b) 0.7 cm s<sup>-1</sup>, (c) 1.7 cm s<sup>-1</sup>, (d) 2.3 cm s<sup>-1</sup>, (e) 3.3 cm s<sup>-1</sup>, (f) 4.2 cm s<sup>-1</sup>, (g) 5.0 cm s<sup>-1</sup>, (h) 5.8 cm s<sup>-1</sup>, and (i) 6.7 cm s<sup>-1</sup>. The lines are least-squares fits of the data.

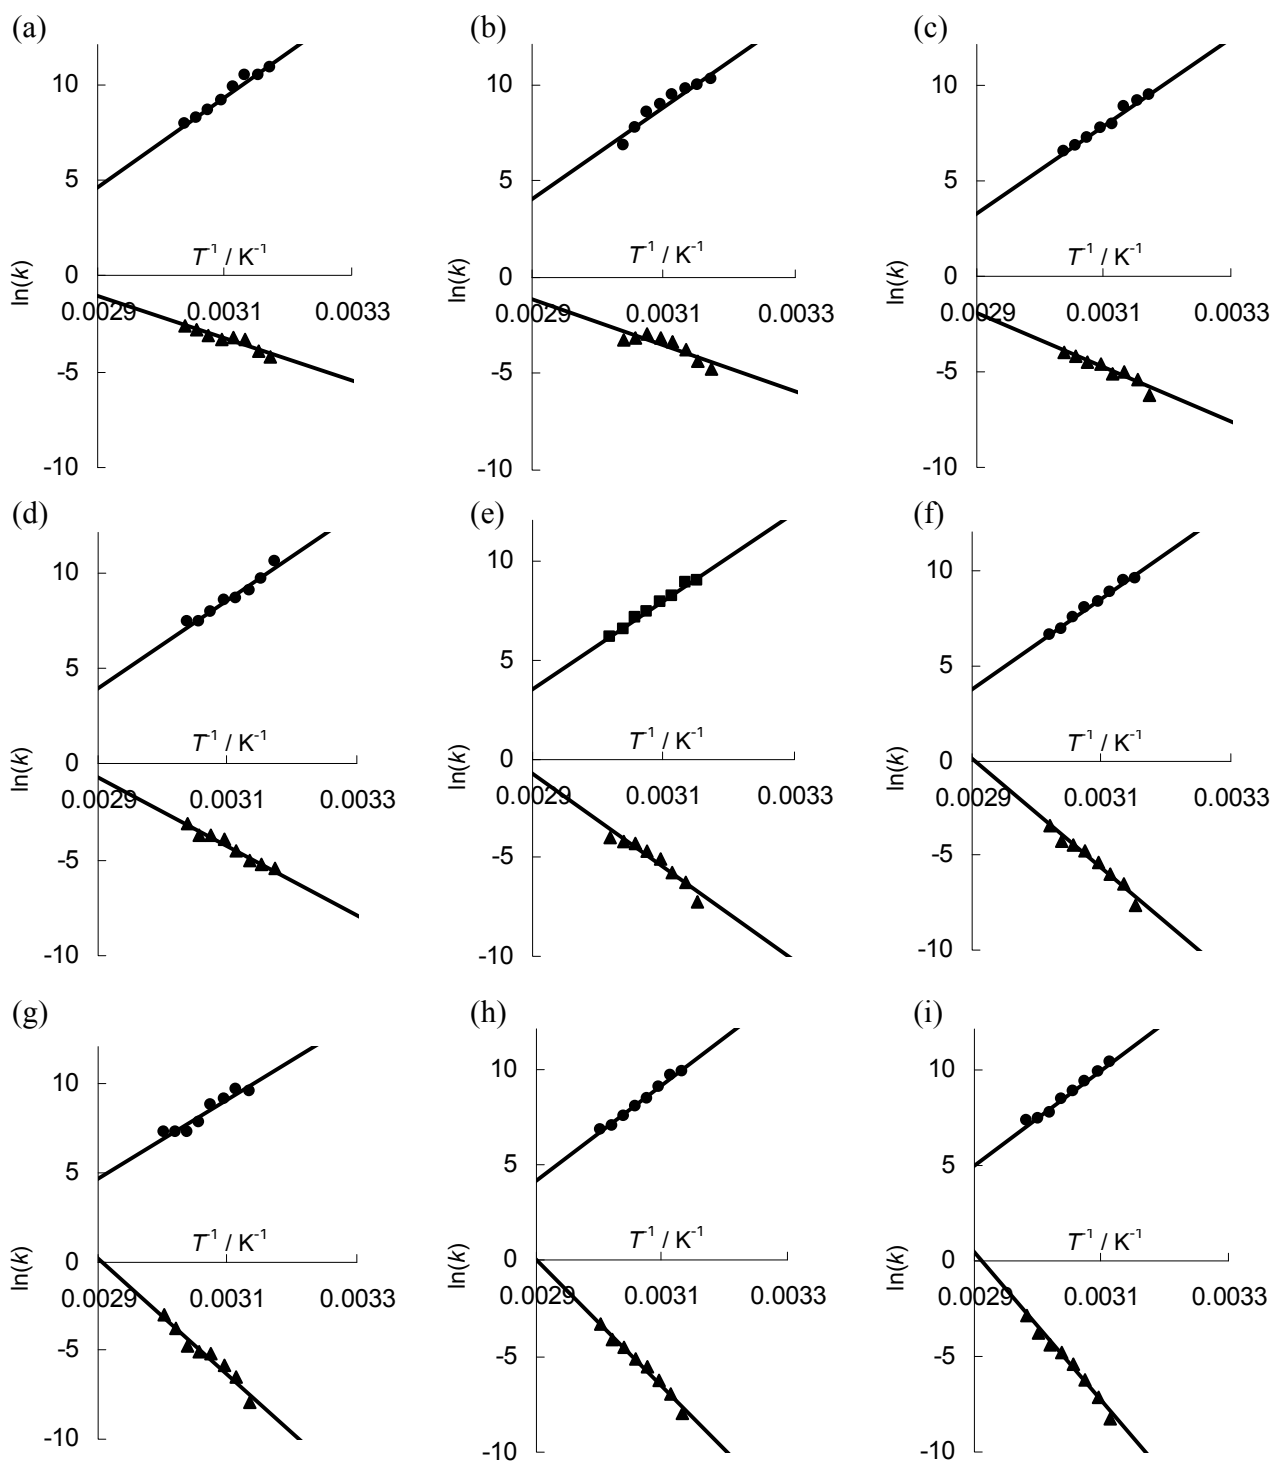

**Figure S2-2.** Arrhenius plots of S3-S4 of (●) association and (▲) dissociation for (a) batchwise or microchannel flow state at (b) 0.7 cm s<sup>-1</sup>, (c) 1.7 cm s<sup>-1</sup>, (d) 2.3 cm s<sup>-1</sup>, (e) 3.3 cm s<sup>-1</sup>, (f) 4.2 cm s<sup>-1</sup>, (g) 5.0 cm s<sup>-1</sup>, (h) 5.8 cm s<sup>-1</sup>, and (i) 6.7 cm s<sup>-1</sup>. The lines are least-squares fits of the data.

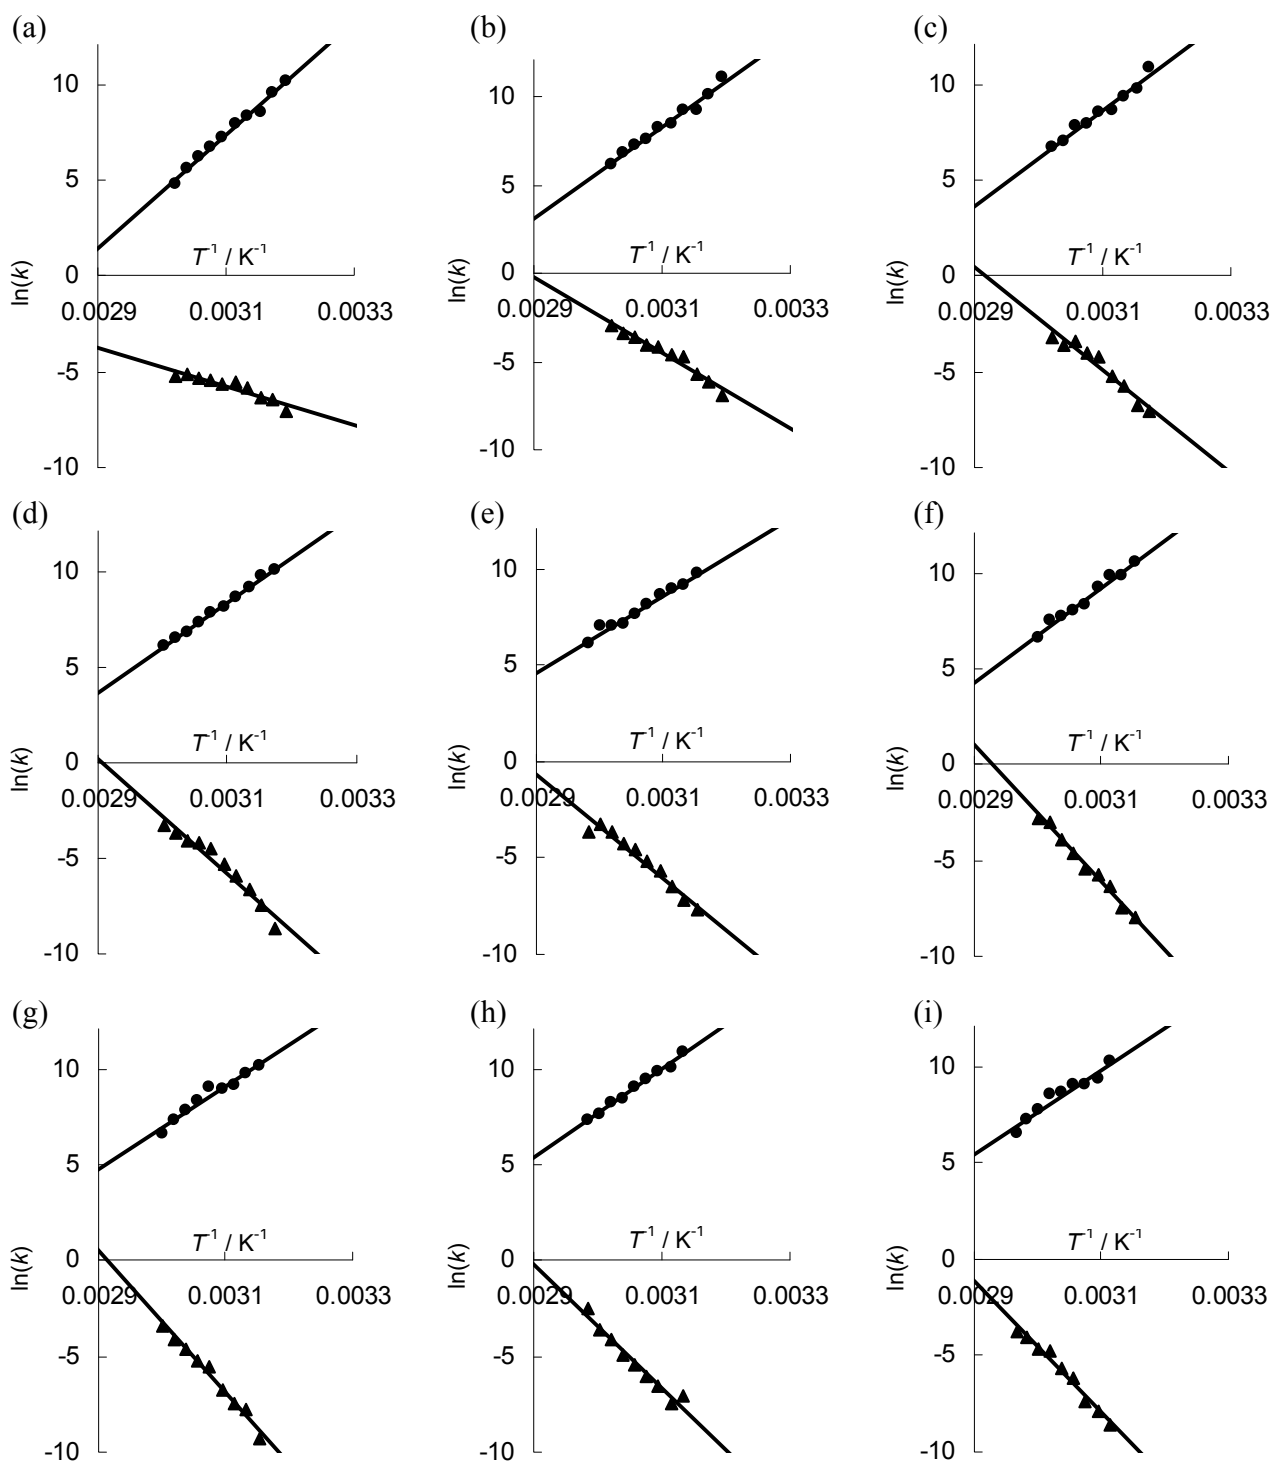

**Figure S2-3.** Arrhenius plots of S5-S6 of (●) association and (▲) dissociation for (a) batchwise or microchannel flow state at (b)  $0.7 \text{ cm s}^{-1}$ , (c)  $1.7 \text{ cm s}^{-1}$ , (d)  $2.3 \text{ cm s}^{-1}$ , (e)  $3.3 \text{ cm s}^{-1}$ , (f)  $4.2 \text{ cm s}^{-1}$ , (g)  $5.0 \text{ cm s}^{-1}$ , (h)  $5.8 \text{ cm s}^{-1}$ , and (i)  $6.7 \text{ cm s}^{-1}$ . The lines are least-squares fits of the data.

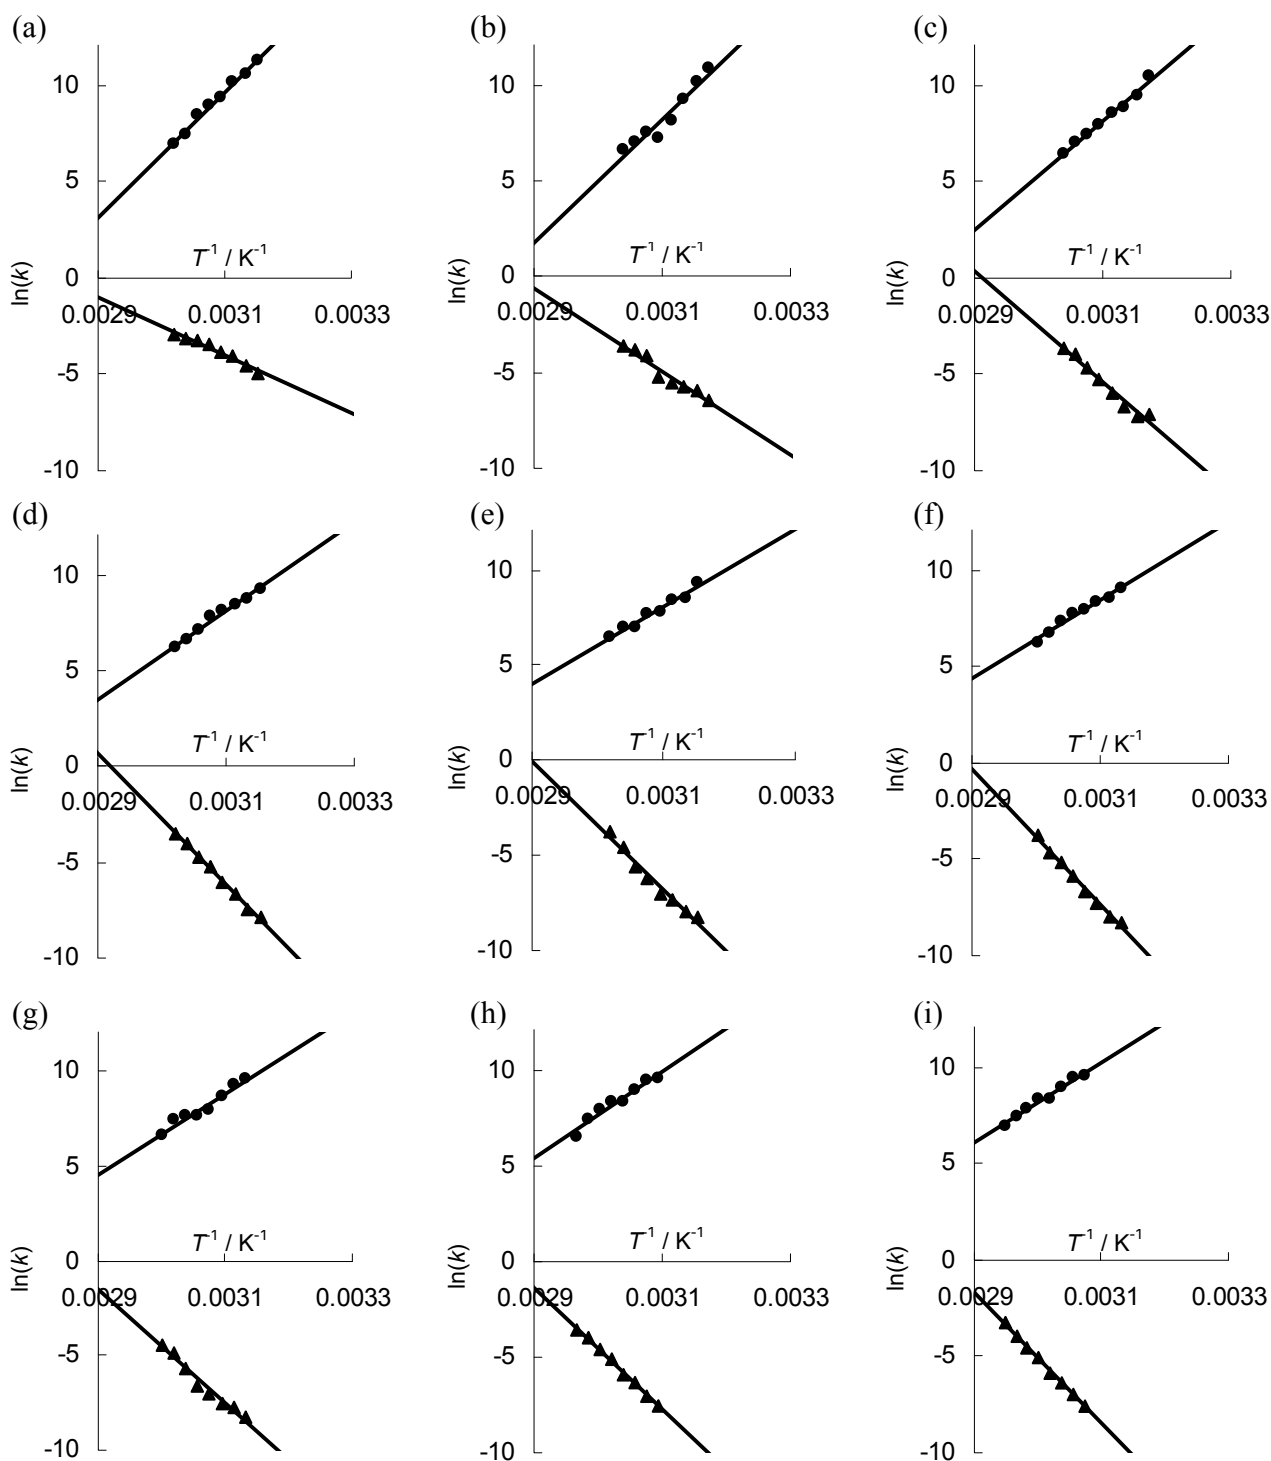

**Figure S2-4.** Arrhenius plots of S7-S8 of (●) association and (▲) dissociation for (a) batchwise or microchannel flow state at (b)  $0.7 \text{ cm s}^{-1}$ , (c)  $1.7 \text{ cm s}^{-1}$ , (d)  $2.3 \text{ cm s}^{-1}$ , (e)  $3.3 \text{ cm s}^{-1}$ , (f)  $4.2 \text{ cm s}^{-1}$ , (g)  $5.0 \text{ cm s}^{-1}$ , (h)  $5.8 \text{ cm s}^{-1}$ , and (i)  $6.7 \text{ cm s}^{-1}$ . The lines are least-squares fits of the data.

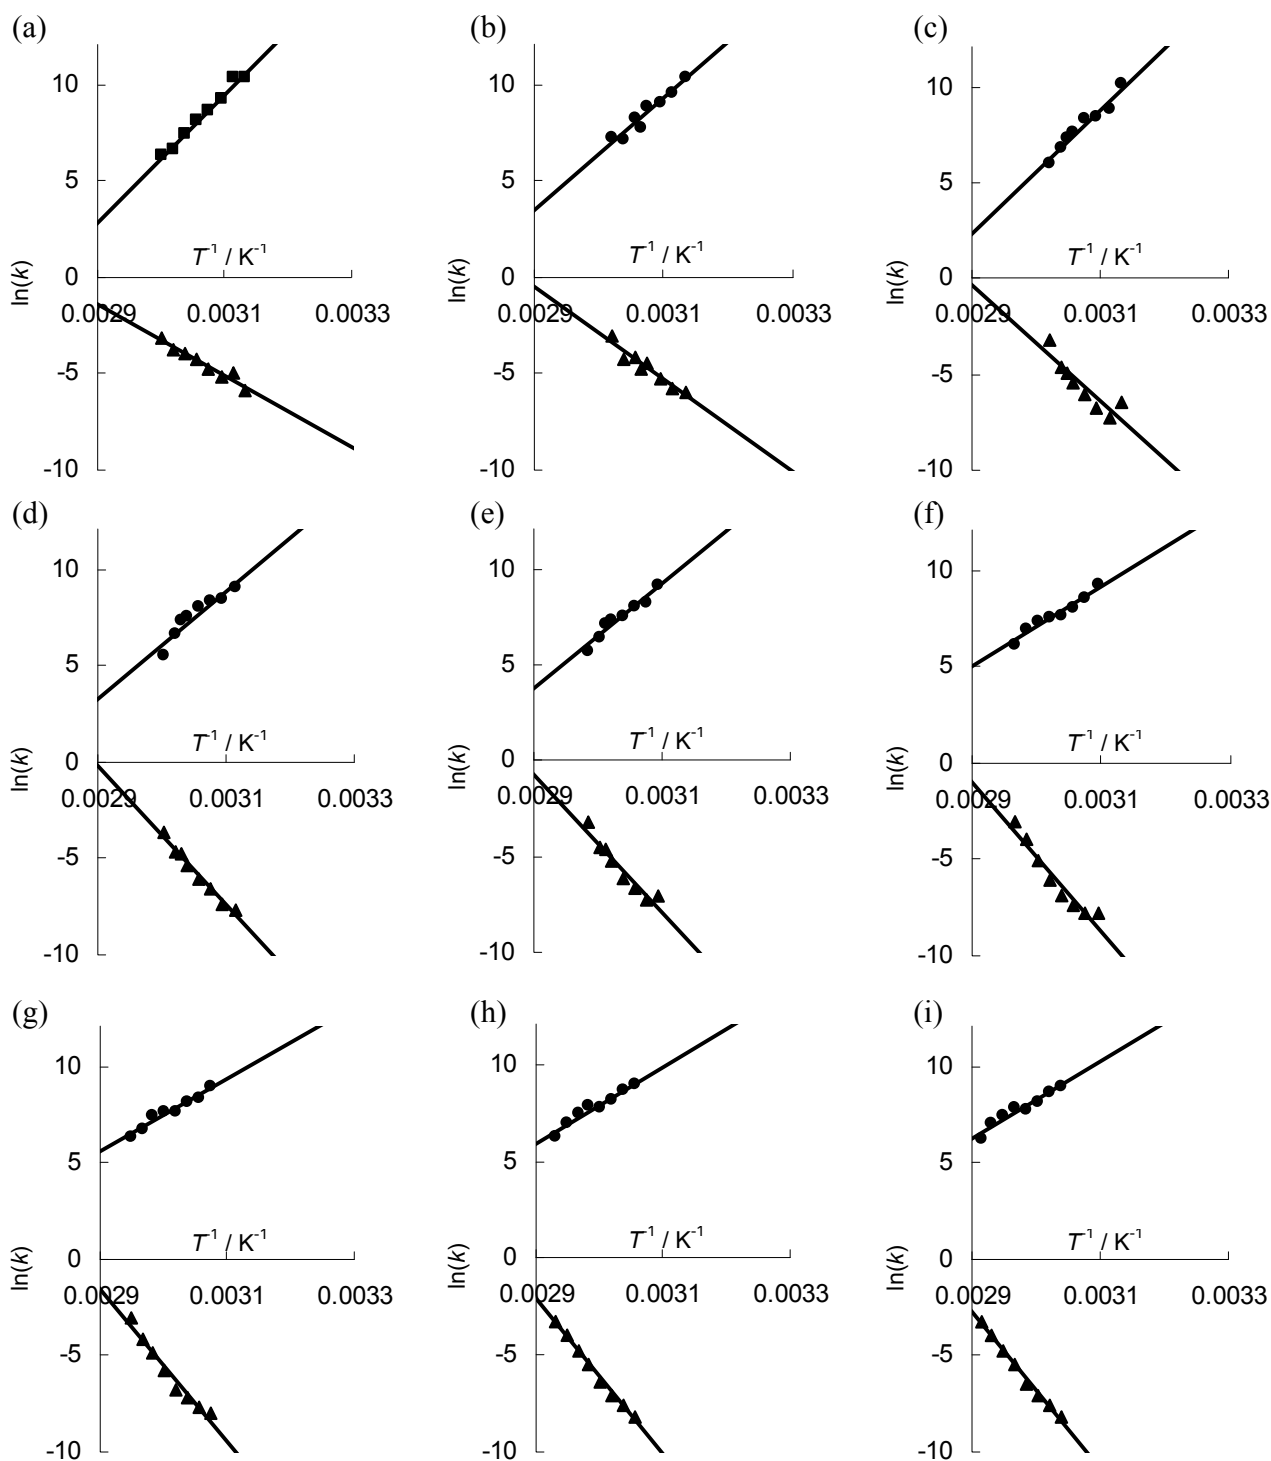

**Figure S2-5.** Arrhenius plots of S9-S10 of (●) association and (▲) dissociation for (a) batchwise or microchannel flow state at (b)  $0.7 \text{ cm s}^{-1}$ , (c)  $1.7 \text{ cm s}^{-1}$ , (d)  $2.3 \text{ cm s}^{-1}$ , (e)  $3.3 \text{ cm s}^{-1}$ , (f)  $4.2 \text{ cm s}^{-1}$ , (g)  $5.0 \text{ cm s}^{-1}$ , (h)  $5.8 \text{ cm s}^{-1}$ , and (i)  $6.7 \text{ cm s}^{-1}$ . The lines are least-squares fits of the data.

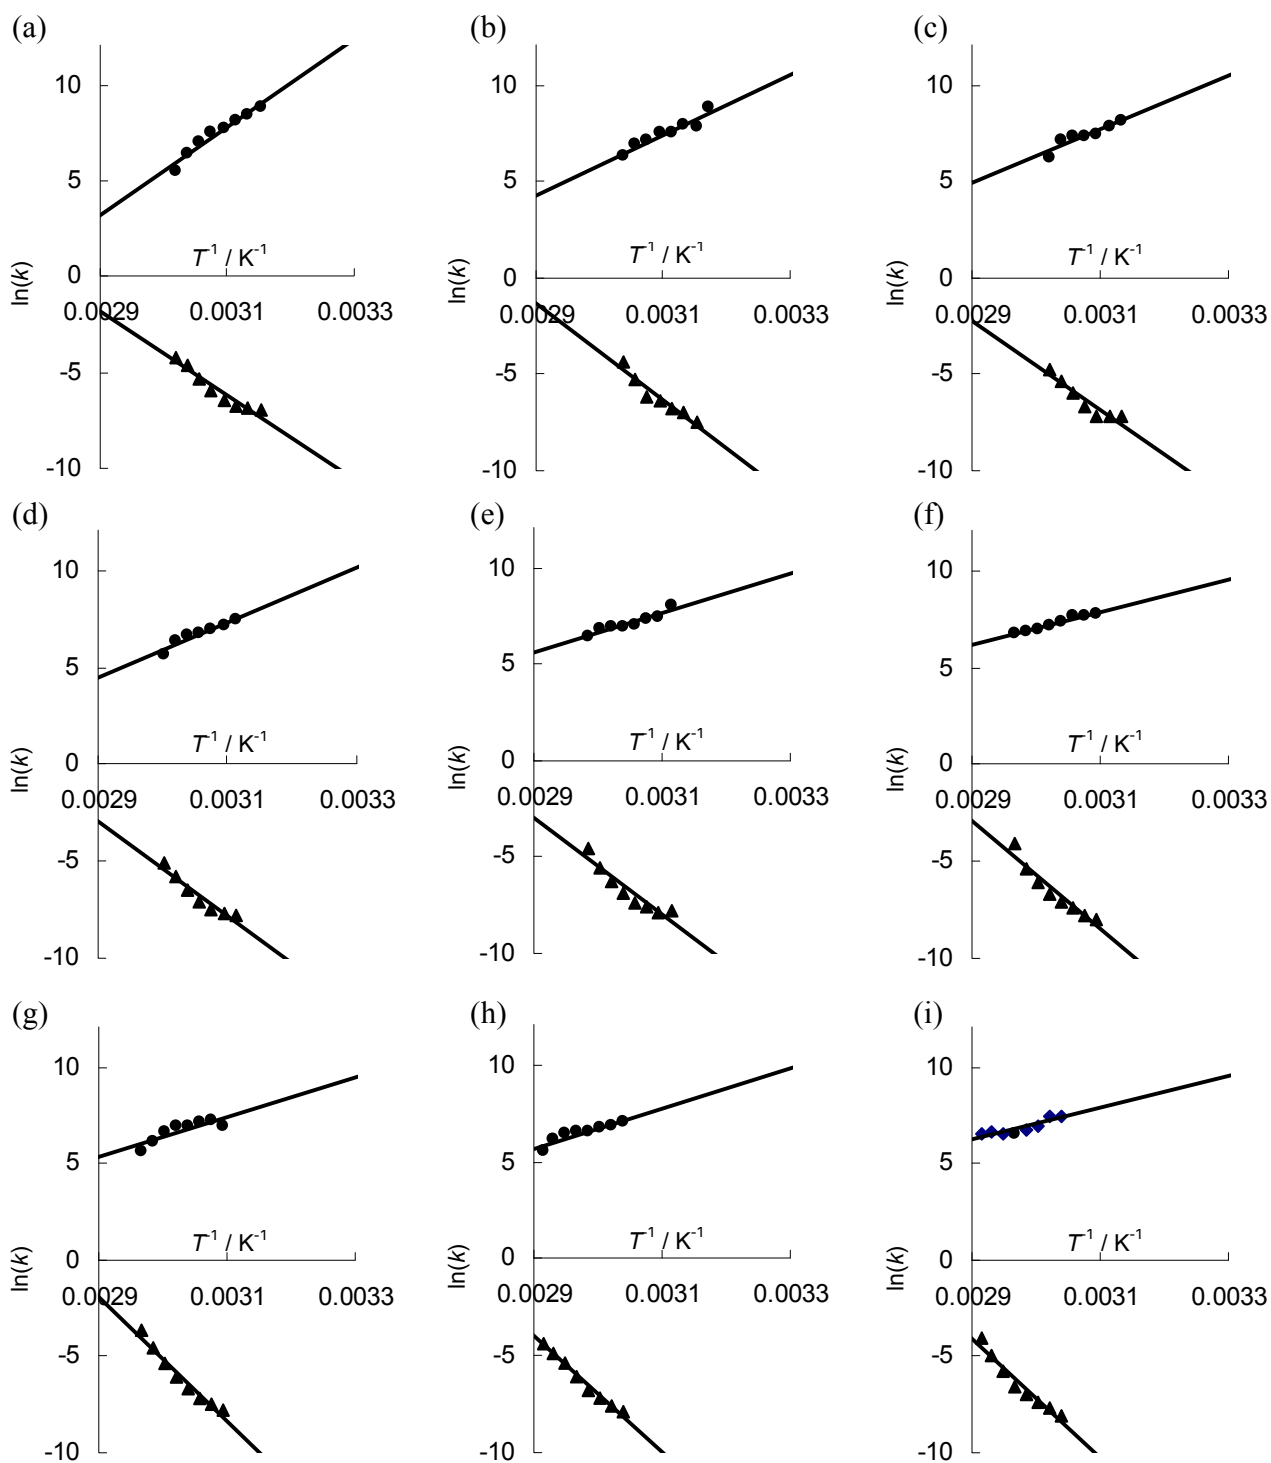

**Figure S2-6.** Arrhenius plots of S11-S12 of (●) association and (▲) dissociation for (a) batchwise or microchannel flow state at (b)  $0.7 \text{ cm s}^{-1}$ , (c)  $1.7 \text{ cm s}^{-1}$ , (d)  $2.3 \text{ cm s}^{-1}$ , (e)  $3.3 \text{ cm s}^{-1}$ , (f)  $4.2 \text{ cm s}^{-1}$ , (g)  $5.0 \text{ cm s}^{-1}$ , (h)  $5.8 \text{ cm s}^{-1}$ , and (i)  $6.7 \text{ cm s}^{-1}$ . The lines are least-squares fits of the data.



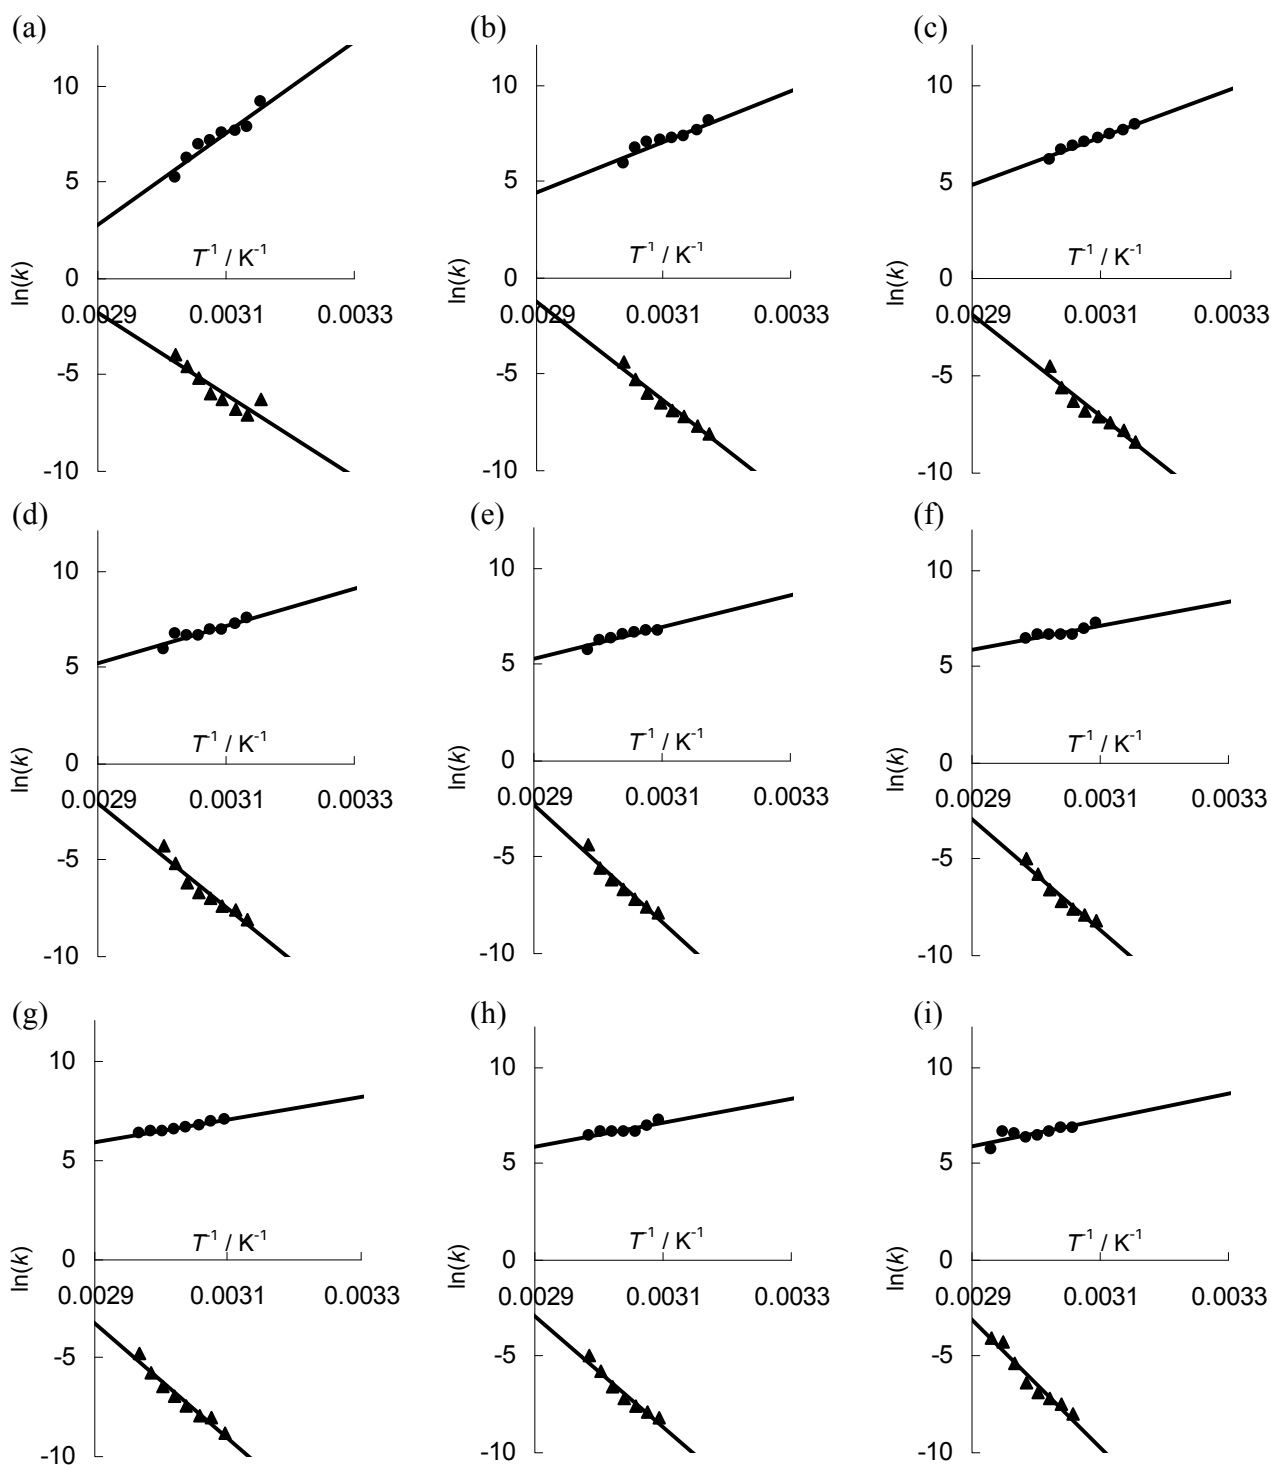

**Figure S2-7.** Arrhenius plots of S13-S14 of (●) association and (▲) dissociation for (a) batchwise or microchannel flow state at (b) 0.7 cm s<sup>-1</sup>, (c) 1.7 cm s<sup>-1</sup>, (d) 2.3 cm s<sup>-1</sup>, (e) 3.3 cm s<sup>-1</sup>, (f) 4.2 cm s<sup>-1</sup>, (g) 5.0 cm s<sup>-1</sup>, (h) 5.8 cm s<sup>-1</sup>, and (i) 6.7 cm s<sup>-1</sup>. The lines are least-squares fits of the data.

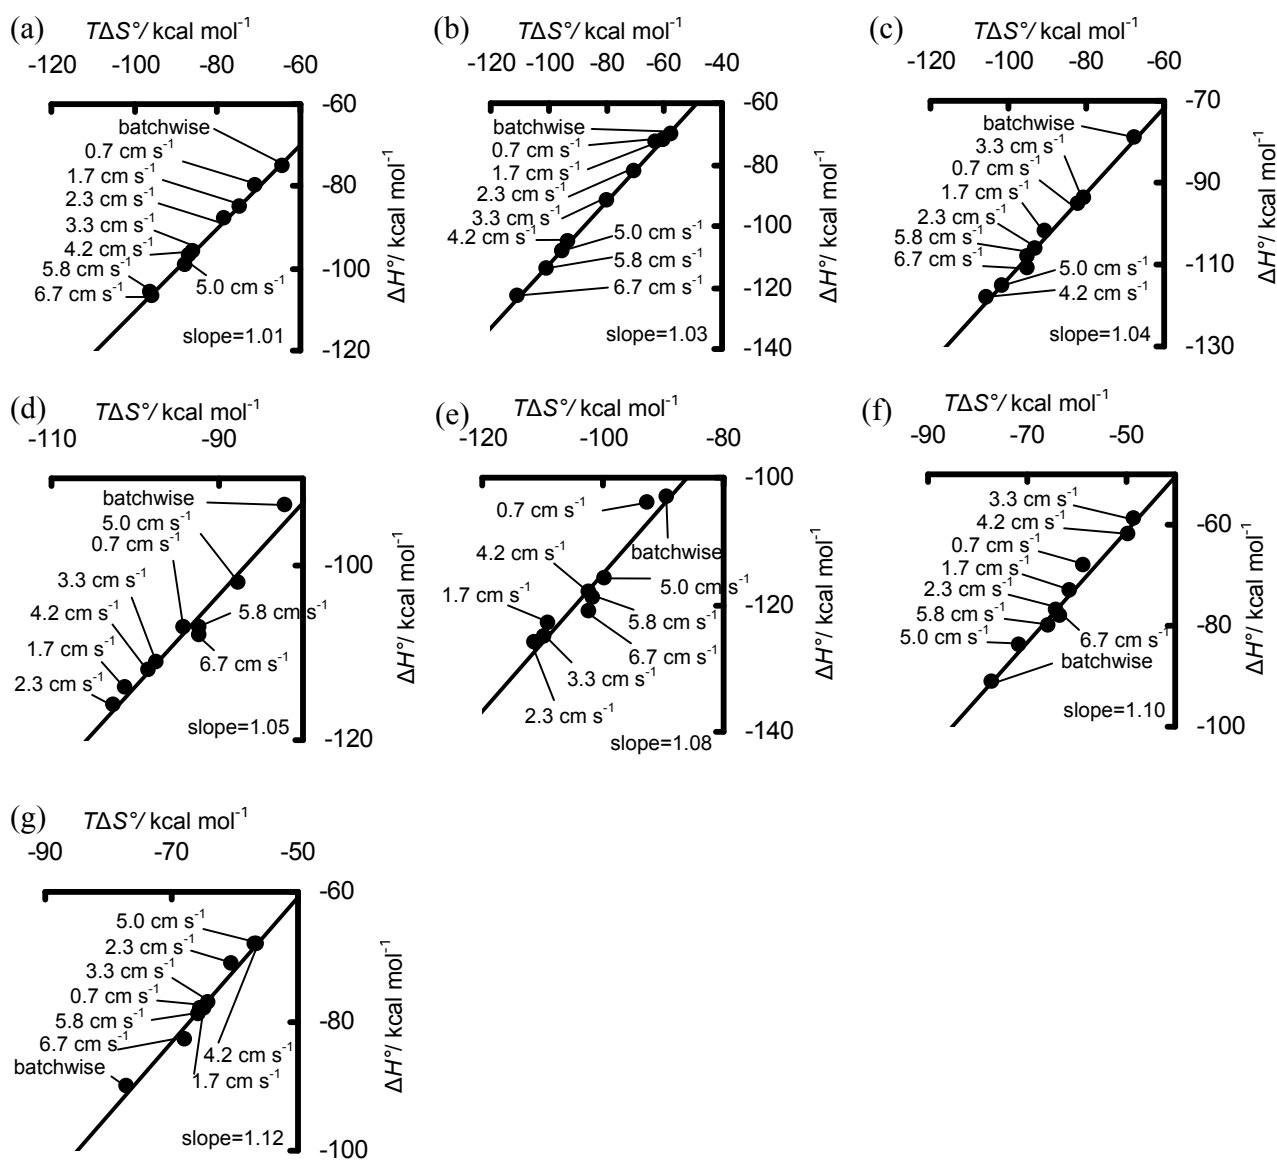

**Figure S3.** Enthalpy-entropy compensation plots of DNA oligomers (a) S1-S2, (b) S3-S4, (c) S5-S6, (d) S7-S8, (e) S9-S10, (f) S11-S12, and (g) S13-14 for batchwise (cuvette with stirring) and microchannel flow state at 37°C. The lines show least-squares fits of the data.
